# Supplementary material for: Dimeric lipo-α/sulfono-γ-AA hybrid peptides as broad-spectrum antibiotic agents
Source: Royal Society of Chemistry journal article supplement (doi:10.1039/d0bm01955k), 2021-01-01
Supplement: d0bm01955k1.pdf [file d0bm01955k1.pdf]

## Supporting information

### **Dimeric lipo- $\alpha$ /sulfono- $\gamma$ -AA hybrid peptides as broad-spectrum antibiotic agents**

Lulu Wei,<sup>†</sup> Ruixuan Gao,<sup>†</sup> Minghui Wang,<sup>†</sup> Yafeng Wang, Yan Shi, Meng Gu and Jianfeng Cai\*

Department of Chemistry, University of South Florida, 4202 E. Fowler Ave, Tampa, FL 33620

\*Corresponding Author: [jianfengcai@usf.edu](mailto:jianfengcai@usf.edu)

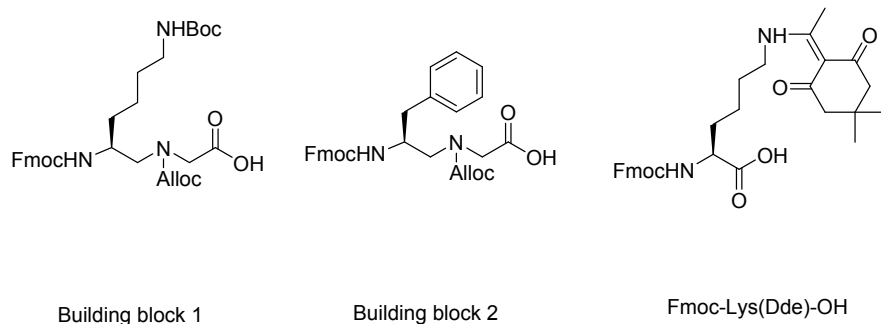

**Figure S1** Sulfonyl- $\gamma$ -AA peptide building blocks and amino acid used in the study

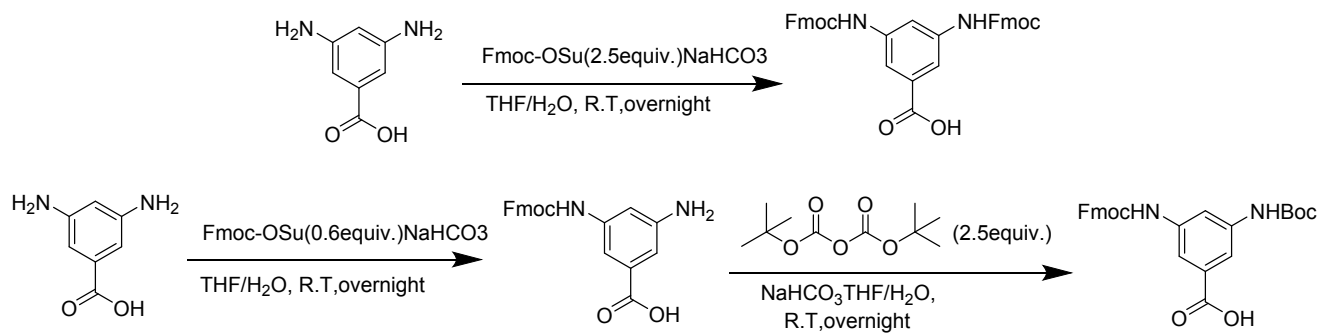

**Figure S2** Synthetic scheme of linker

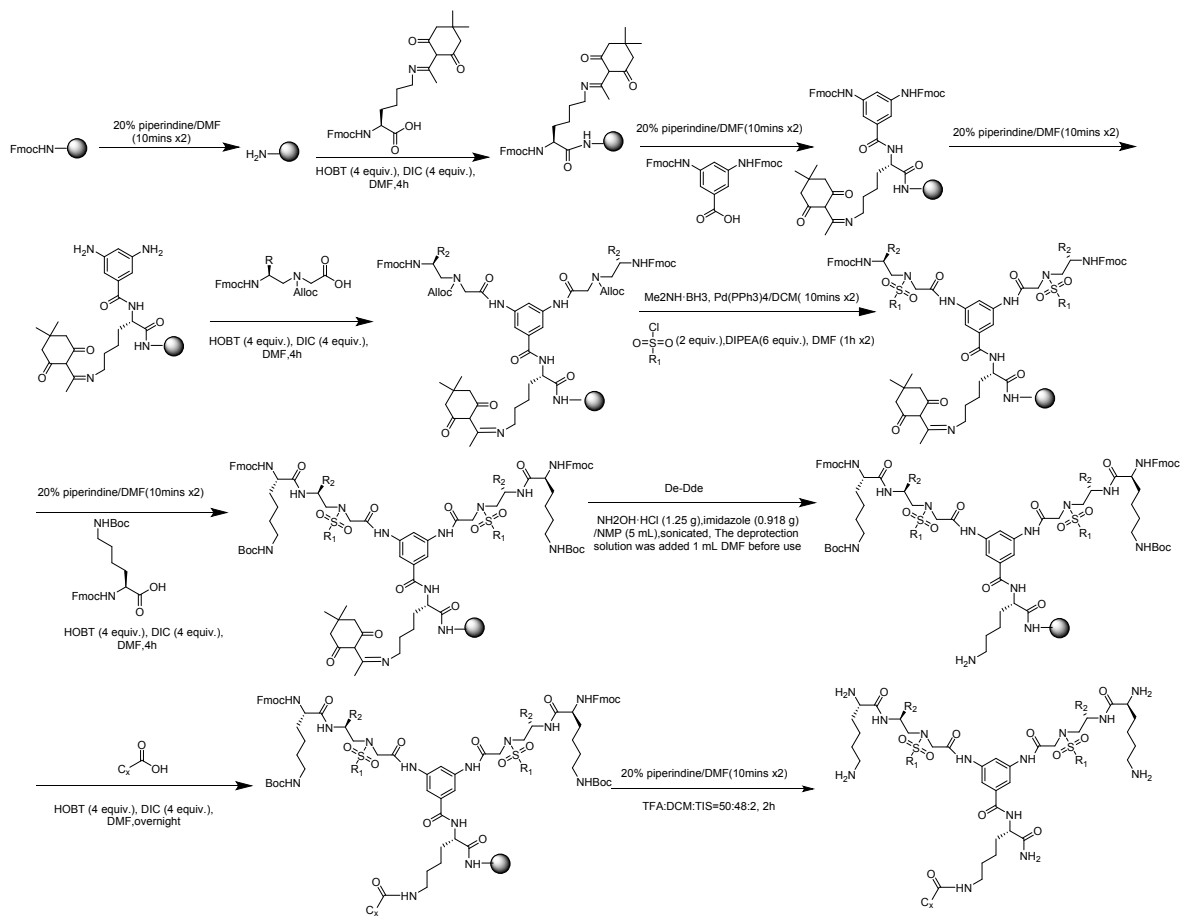

Figure S3 General synthetic scheme of Dimeric lipo- $\alpha$ /sulfono- $\gamma$ -AA peptides

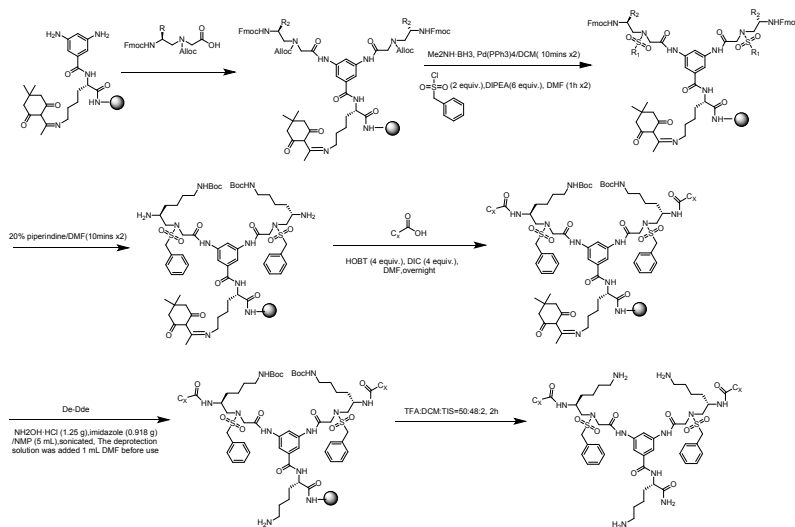

Figure S4 Typical synthetic route for compound 9 and 10

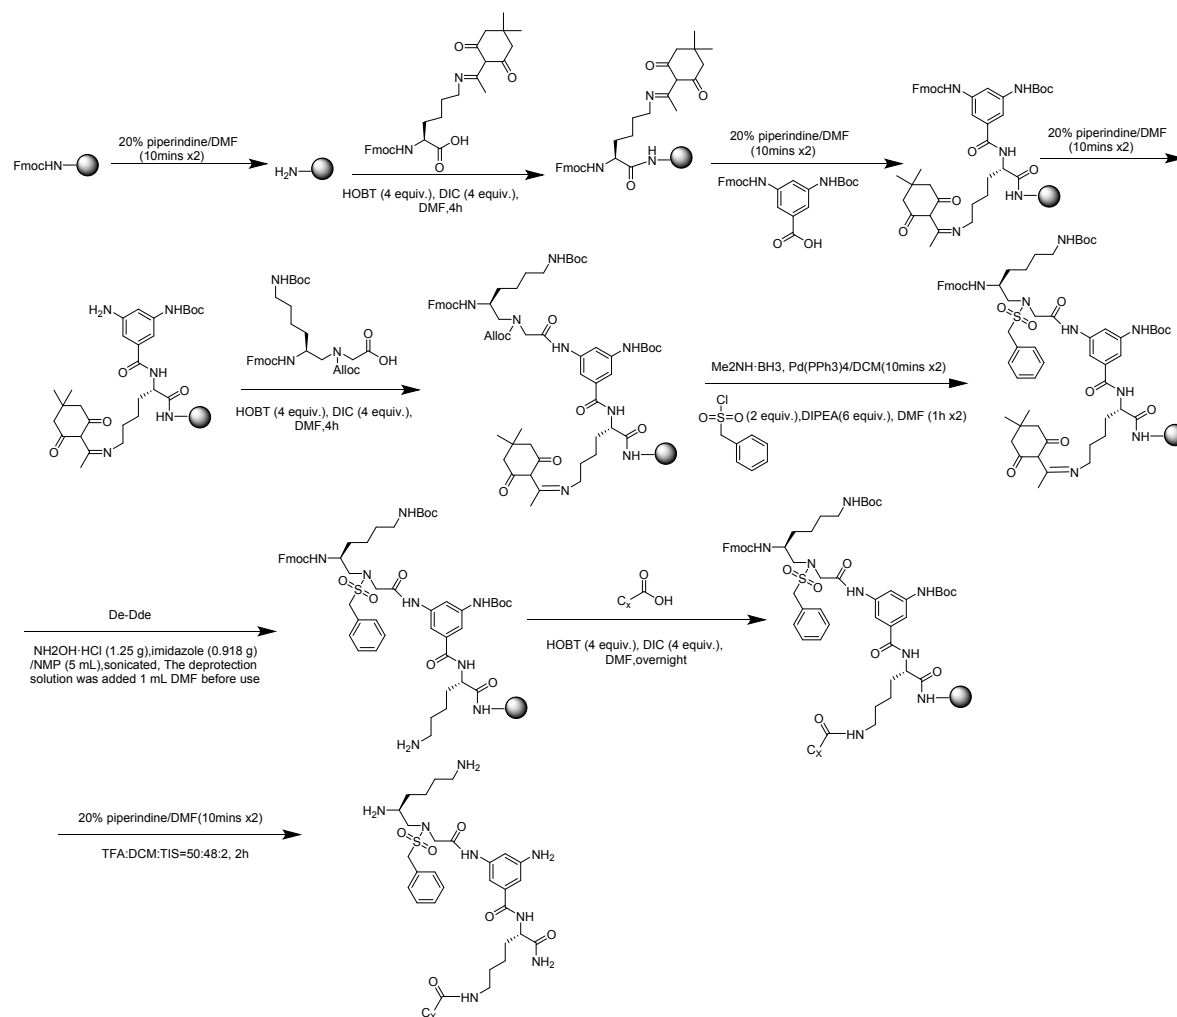

**Figure S5** Typical synthetic route for compound **8**

| Dimeric lipo- $\alpha$ /sulfonyl- $\gamma$ -AA peptides | Exact Mass | Observed (MALDI-TOF) |
|---------------------------------------------------------|------------|----------------------|
| 1                                                       | 1367.82    | 1368.91              |
| 2                                                       | 1423.88    | 1424.89              |
| 3                                                       | 1339.79    | 1340.81              |
| 4                                                       | 1311.76    | 1312.83              |
| 5                                                       | 1283.72    | 1285.14              |

|    |         |         |
|----|---------|---------|
| 6  | 1111.63 | 1112.71 |
| 7  | 1167.69 | 1169.11 |
| 8  | 842.55  | 843.91  |
| 9  | 1293.80 | 1295.33 |
| 10 | 1405.92 | 1406.93 |
| 11 | 1311.76 | 1312.85 |
| 12 | 1017.62 | 1018.71 |
| 13 | 1423.96 | 1425.19 |
| 14 | 1367.82 | 1368.97 |
| 15 | 1399.81 | 1400.95 |
| 16 | 1429.76 | 1430.87 |
| 17 | 1407.71 | 1408.74 |
| 18 | 1495.61 | 1496.71 |
| 19 | 1439.82 | 1440.85 |
| 20 | 1439.82 | 1440.85 |

**Table S1.** MALDI analysis of Dimeric lipo- $\alpha$ /sulfono- $\gamma$ -AA hybrid peptides

| Dimeric lipo- $\alpha$ /sulfono- $\gamma$ -AA peptides | Purity trace after HPLC purification (%) | Retention Time (min) |
|--------------------------------------------------------|------------------------------------------|----------------------|
| 1                                                      | 100.00                                   | 19.09                |
| 2                                                      | 99.86                                    | 22.99                |
| 3                                                      | 100.00                                   | 17.70                |
| 4                                                      | 98.98                                    | 15.66                |
| 5                                                      | 99.50                                    | 13.73                |

|    |        |       |
|----|--------|-------|
| 6  | 99.97  | 21.73 |
| 7  | 98.59  | 26.59 |
| 8  | 99.91  | 22.12 |
| 9  | 99.07  | 29.53 |
| 10 | 99.84  | 39.18 |
| 11 | 100.00 | 18.74 |
| 12 | 100.00 | 17.39 |
| 13 | 99.99  | 19.60 |
| 14 | 99.96  | 18.75 |
| 15 | 99.85  | 18.52 |
| 16 | 99.92  | 18.53 |
| 17 | 100.00 | 19.70 |
| 18 | 99.75  | 19.55 |
| 19 | 99.90  | 19.75 |
| 20 | 99.91  | 19.64 |

**Table S2.** HPLC purities and retention time of Dimeric lipo- $\alpha$ /sulfonyl- $\gamma$ -AA peptides. The gradient eluting method of 5% to 100% of solvent B (0.1% TFA in acetonitrile) in A (0.1% TFA in water) was performed

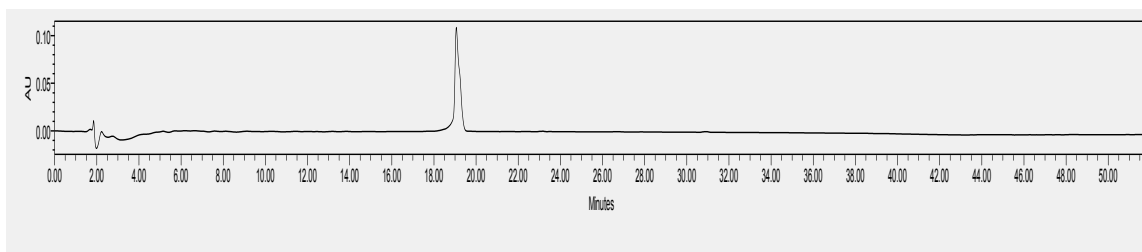

Compound 1

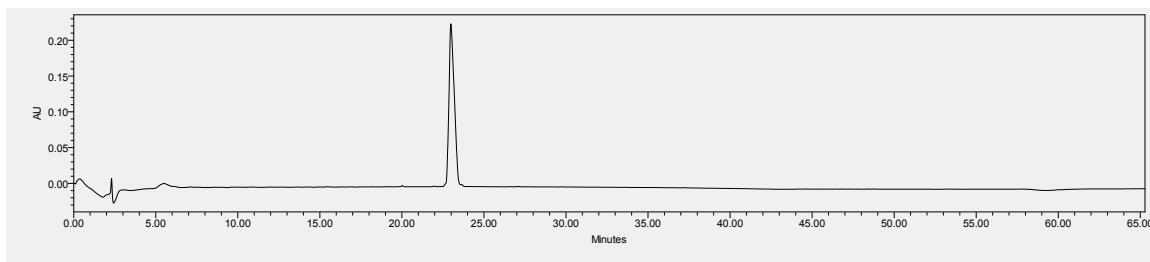

Compound 2

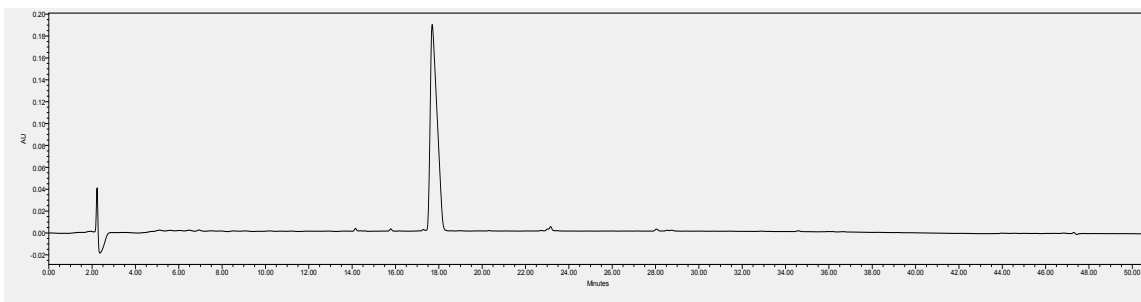

Compound 3

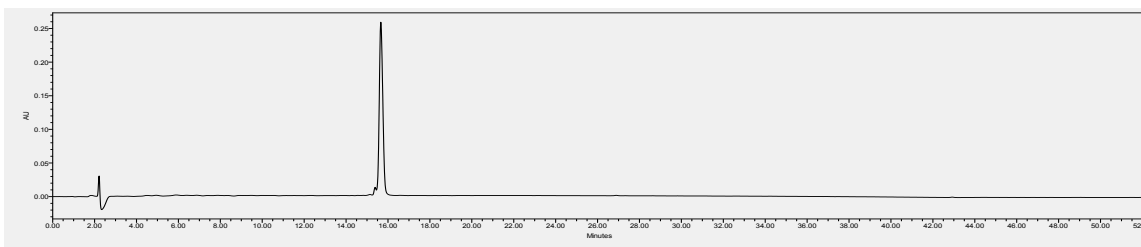

Compound 4

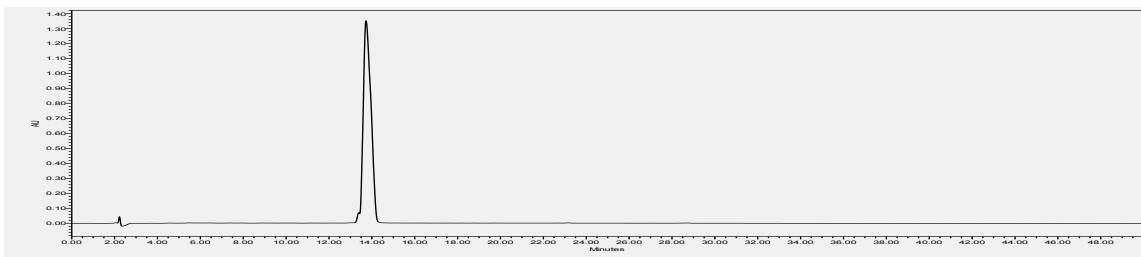

Compound 5

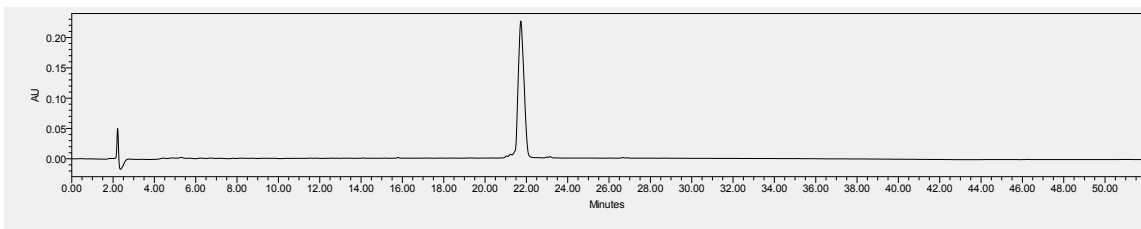

Compound 6

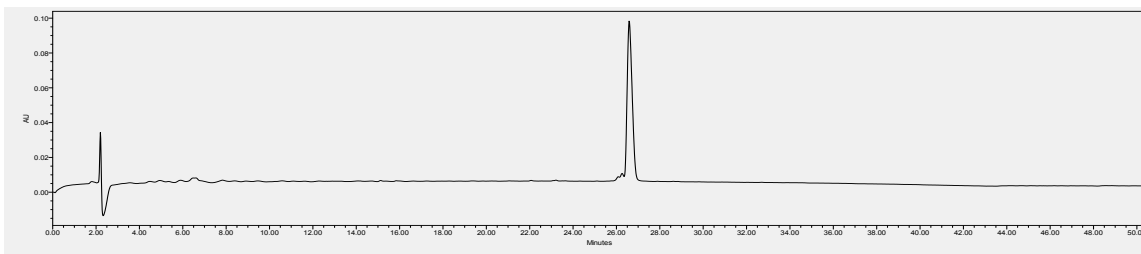

Compound 7

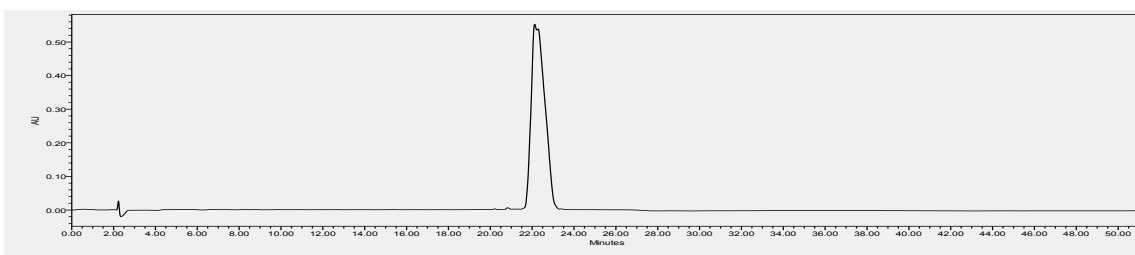

Compound 8

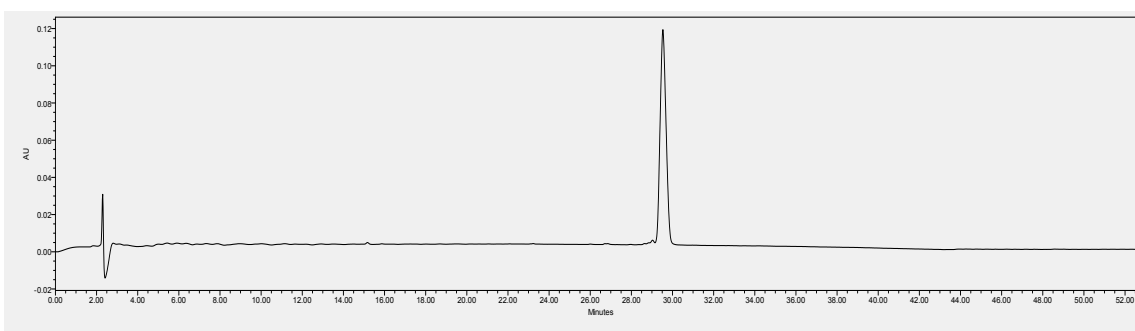

Compound 9

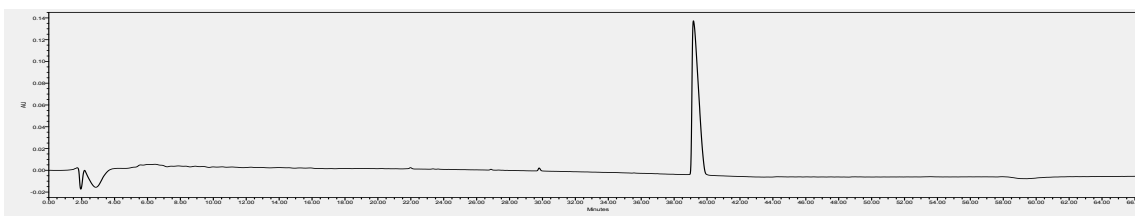

Compound 10

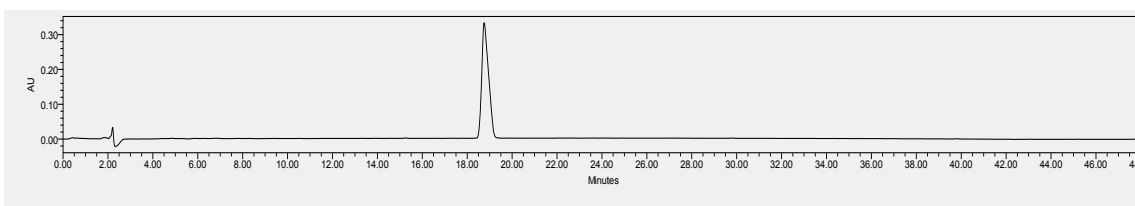

Compound 11



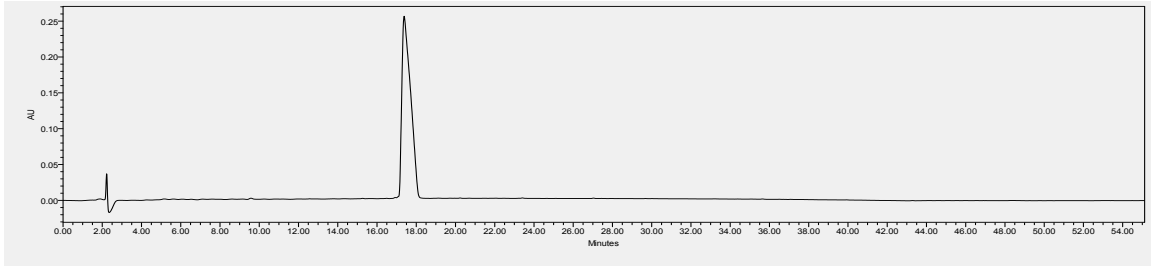

Compound 12

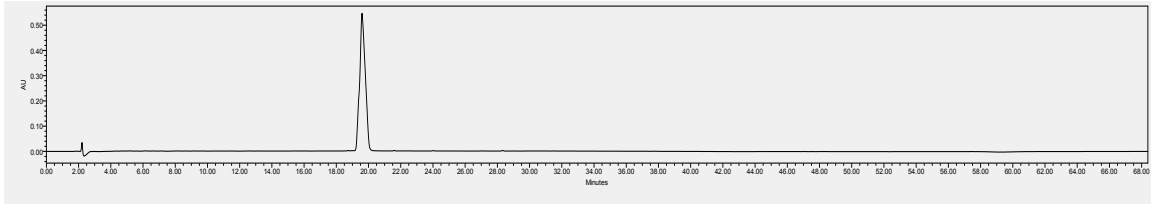

Compound 13

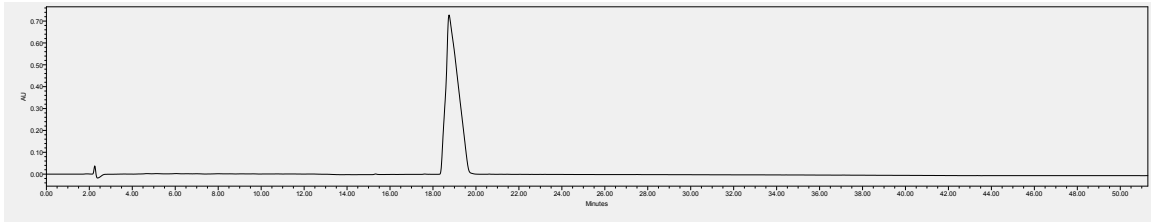

Compound 14

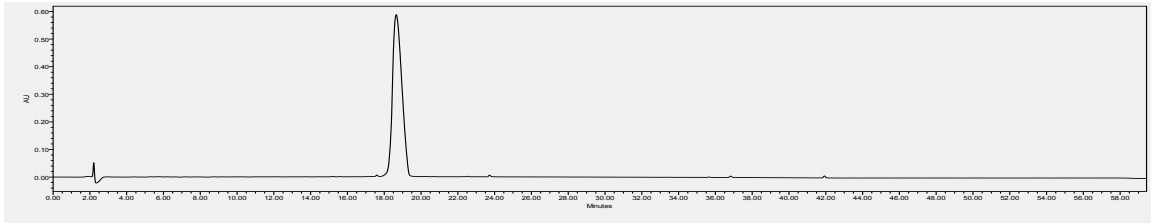

Compound 15

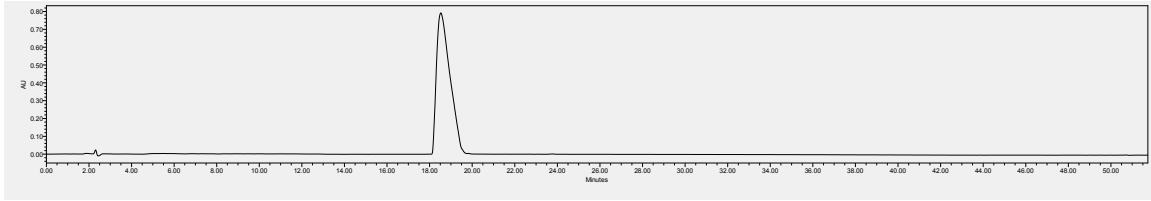

Compound 16

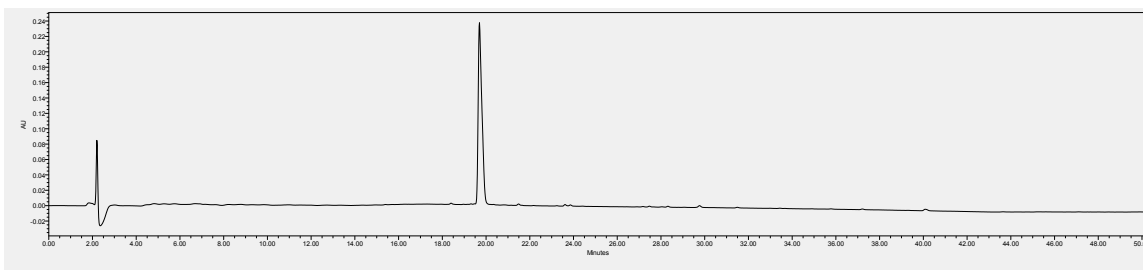

Compound 17

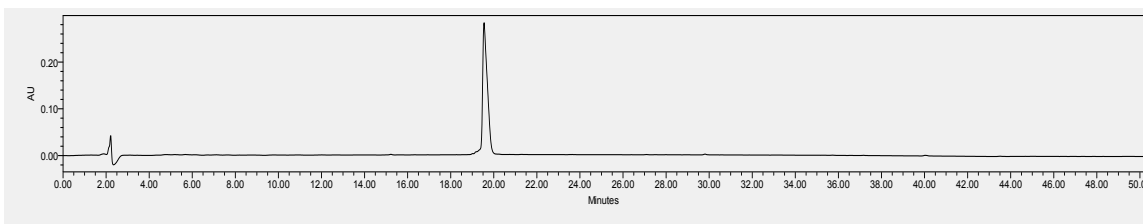

Compound 18

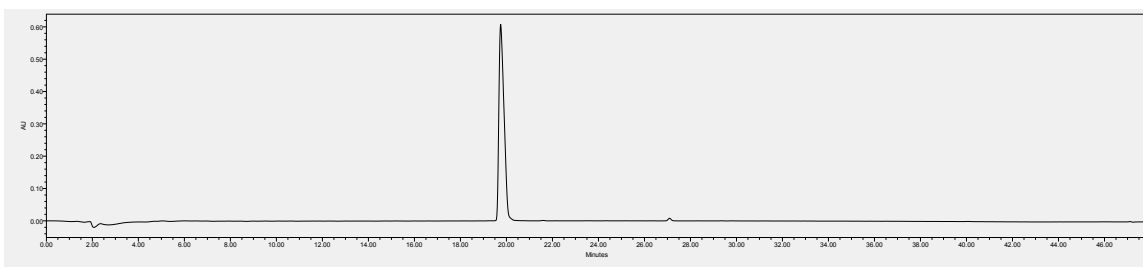

Compound 19

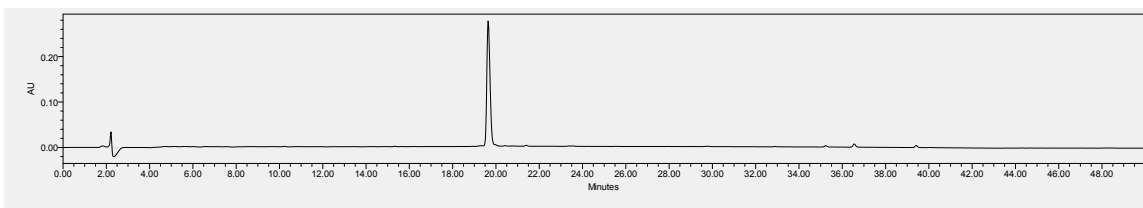

Compound 20

**Figure S6** Analytical HPLC trace of Dimeric lipo- $\alpha$ /sulfo- $\gamma$ -AA peptides

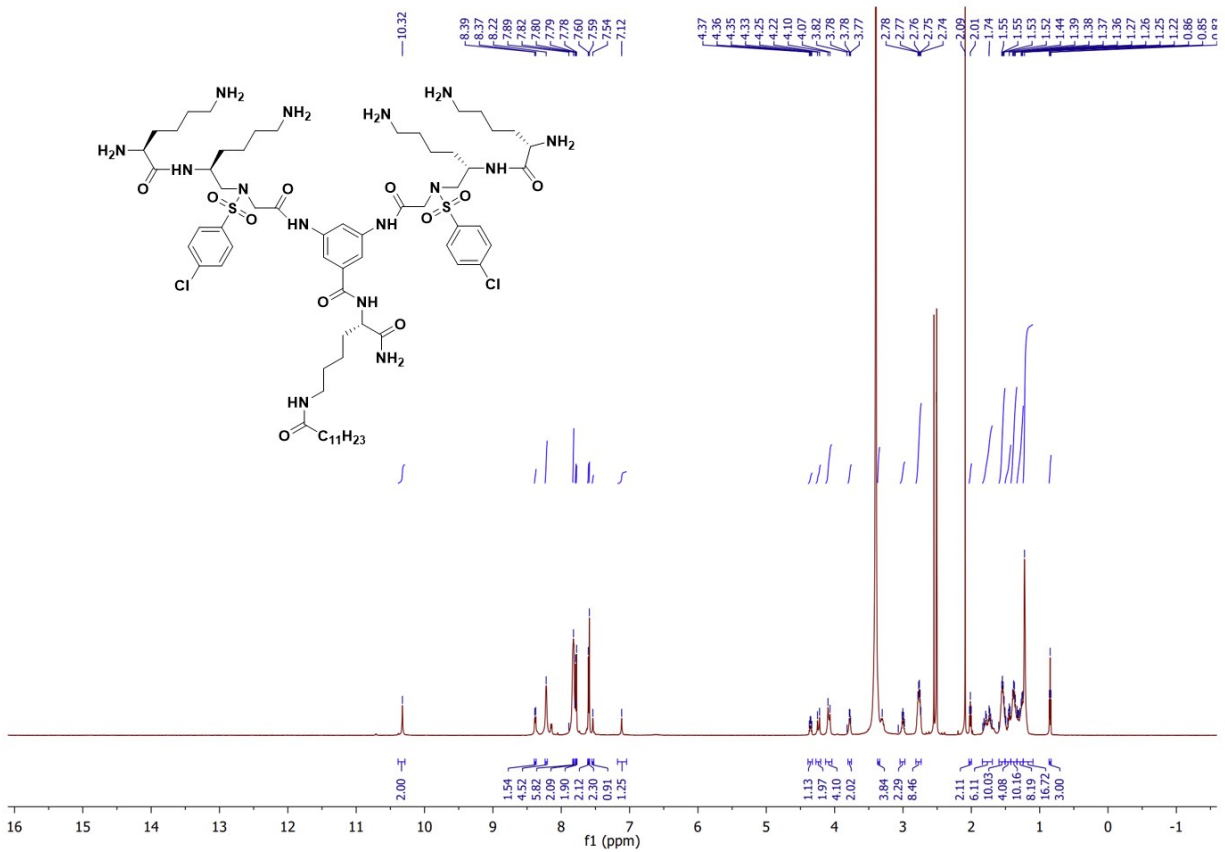

Figure S7 <sup>1</sup>H NMR (DMSO-d<sub>6</sub>) spectra of compounds 17

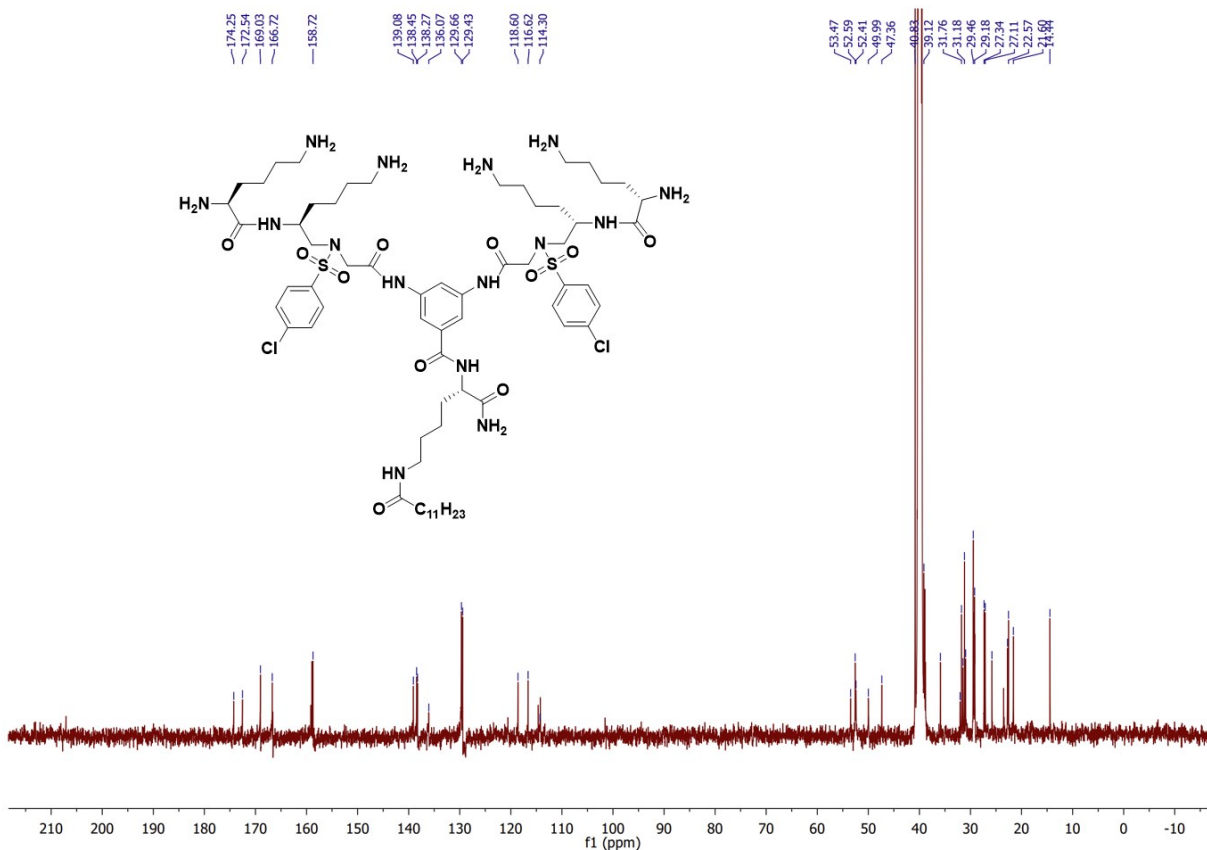

**Figure S8**  $^{13}\text{C}$  NMR (DMSO- $d_6$ ) spectra of compounds **17**

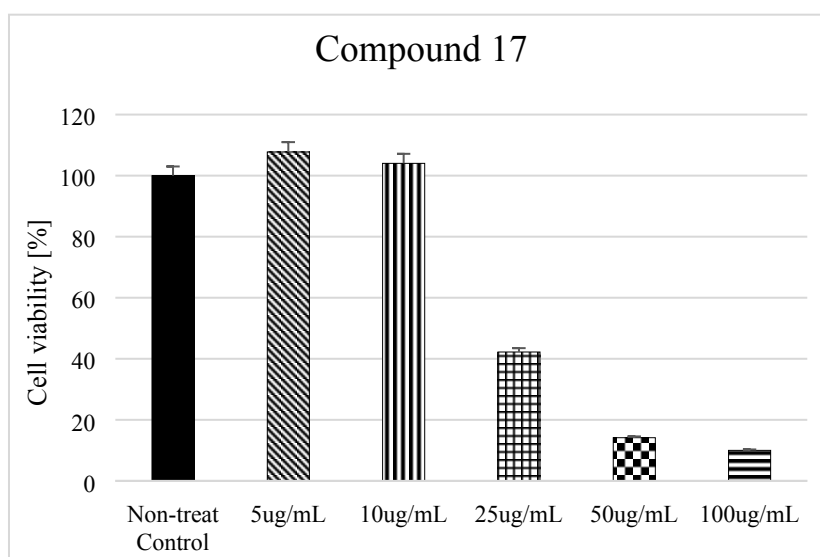

**Figure S9** Cytotoxicity of the **17** against HeLa cells
